# Supplementary material
Source: Springer Nature journal article supplement (https://www.springermedizin.de/resource/supplementary/12887_2012_794_MOESM1_ESM.pdf/9476204)

## Nutritional knowledge

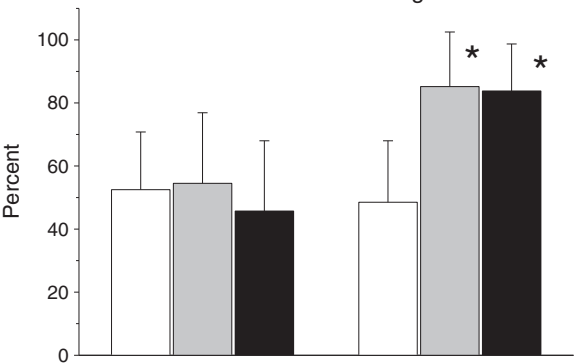

## Nutritional preference

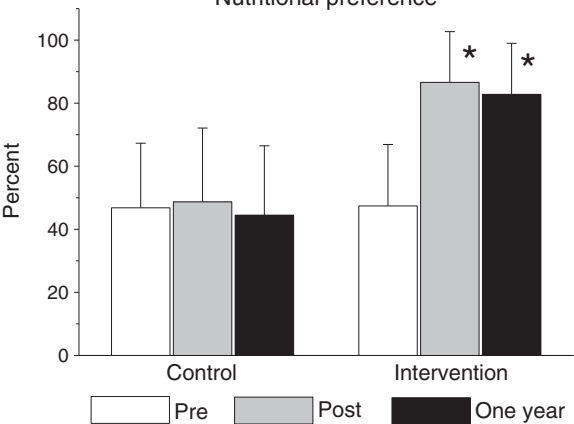

Supplement: MOESM1 [file 9476204]
